# Supplementary material for: Rearrangement of the 1-oxaspiro[4.5]deca-6,9-dien-8-ylium ion. Part 1. A semiempirical (AM1), density functional and ab initio molecular orbital computational studyElectronic supplementary information (ESI) available: the heats of formation and total energies, Mulliken charges, and cartesian coordinates computed for all structures have been tabulated. See http://www.rsc.org/suppdata/p2/b1/b105629h/
Source: Royal Society of Chemistry journal article supplement (doi:10.1039/b105629h), 2002-01-07
Supplement: b105629h.doc [file b105629h.doc]

### Supplementary data

**Table 1** AM1 heats of formation and *ab initio* and density functional total energies of cations **13**-**18'**.

|  | Hf /kJ mol-1 | Etot/hartrees | | | | | |
| --- | --- | --- | --- | --- | --- | --- | --- |
|  | AM1 | HF/3-21G//AM1a | HF/6-31G*//AM1a | HF/3-21G | HF/6-31G*//3-21Ga | B3LYP/6-31G* | MP2/6-31G*// B3LYP/6-31G*a |
| **13** | 846.9 |  |  |  |  |  |  |
| **14** | 730.1 | -419.42963 | -421.77752 | -419.45115 | -421.79323 | -424.49222 | -423.09888 |
| **15** | 832.9 | -419.41310 | -421.75505 |  |  | -424.47727 | -423.08683 |
| **16** | 683.8 | -419.44123 | -421.79321 | -419.45714 | -421.80584 | -424.50472 | -423.10756 |
| **17** | 804.4 | -419.42103 | -421.76127 |  |  | -424.48622 | -423.09596 |
| **18** | 630.8 | -419.47277 | -421.82035 | -419.49178 | -421.83635 | -424.53753 | -423.14240 |
| **18'** | 634.9 |  |  | -419.49146 |  | -424.53564 | -423.14003 |

a Single point calculations.

**Table 2** AM1, *ab initio* and density functional Mulliken atomic charges for cations **14**-**18**.a

|  | AM1 | | | | |  | 3-21G and 3-21G//AM1b | | | | |  | 6-31G*//3-21Gc and 6-31G//AM1d | | | | |  | B3LYP/6-31G* | | | | |  | MP2/6-31G*//B3LYP/6-31G* | | | | |
| --- | --- | --- | --- | --- | --- | --- | --- | --- | --- | --- | --- | --- | --- | --- | --- | --- | --- | --- | --- | --- | --- | --- | --- | --- | --- | --- | --- | --- | --- |
| Atom | **16** | **15** | **14** | **17** | **18** |  | **16** | **15**b | **14** | **17**b | **18** |  | **16**c | **15**d | **14**c | **17**d | **18**c |  | **16** | **15** | **14** | **17** | **18** |  | **16** | **15** | **14** | **17** | **18** |
| O(1) | -0.220 | -0.138 | -0.235 | -0.172 | -0.117 |  | -0.614 | -0.525 | -0.619 | -0.646 | -0.674 |  | -0.638 | -0.592 | -0.663 | -0.614 | -0.602 |  | -0.453 | -0.425 | -0.489 | -0.472 | -0.419 |  | -0.617 | -0.627 | -0.641 | -0.618 | -0.590 |
| C(2) | 0.214 | 0.248 | 0.214 | 0.258 | 0.255 |  | 0.408 | 0.450 | 0.428 | 0.450 | 0.446 |  | 0.405 | 0.436 | 0.433 | 0.417 | 0.442 |  | 0.309 | 0.371 | 0.336 | 0.335 | 0.342 |  | 0.390 | 0.448 | 0.415 | 0.416 | 0.424 |
| C(3) | 0.064 | 0.076 | 0.063 | 0.063 | 0.063 |  | 0.078 | 0.075 | 0.051 | 0.051 | 0.071 |  | 0.082 | 0.073 | 0.067 | 0.106 | 0.084 |  | 0.091 | 0.064 | 0.095 | 0.135 | 0.091 |  | 0.084 | 0.045 | 0.079 | 0.117 | 0.080 |
| C(4) | 0.113 | 0.119 | 0.094 | 0.365 | 0.109 |  | 0.093 | 0.150 | 0.137 | 0.365 | 0.183 |  | 0.080 | 0.112 | 0.089 | 0.316 | 0.129 |  | 0.059 | 0.094 | 0.094 | 0.187 | 0.127 |  | 0.089 | 0.122 | 0.091 | 0.245 | 0.137 |
| C(5) | 0.119 | 0.083 | 0.027 | 0.011 | 0.267 |  | 0.126 | 0.012 | 0.026 | 0.254 | 0.698 |  | 0.134 | 0.193 | 0.218 | 0.289 | 0.607 |  | 0.187 | 0.189 | 0.253 | 0.292 | 0.460 |  | 0.138 | 0.161 | 0.218 | 0.266 | 0.595 |
| C(6) | -0.042 | 0.049 | 0.274 | 0.119 | -0.045 |  | 0.018 | 0.162 | 0.341 | 0.139 | 0.008 |  | 0.020 | 0.122 | 0.257 | 0.114 | -0.001 |  | 0.064 | 0.134 | 0.161 | 0.104 | 0.065 |  | 0.021 | 0.177 | 0.258 | 0.128 | -0.002 |
| C(7) | 0.340 | 0.098 | -0.041 | 0.064 | 0.287 |  | 0.271 | 0.095 | 0.012 | 0.070 | 0.214 |  | 0.257 | 0.085 | 0.041 | 0.068 | 0.205 |  | 0.158 | 0.090 | 0.117 | 0.087 | 0.128 |  | 0.246 | 0.060 | 0.035 | 0.068 | 0.210 |
| C(8) | -0.023 | 0.194 | 0.372 | 0.166 | 0.003 |  | 0.021 | 0.149 | 0.272 | 0.135 | 0.035 |  | 0.052 | 0.152 | 0.262 | 0.136 | 0.055 |  | 0.122 | 0.144 | 0.163 | 0.123 | 0.107 |  | 0.047 | 0.212 | 0.259 | 0.149 | 0.051 |
| C(9) | 0.260 | -0.030 | -0.040 | 0.018 | 0.140 |  | 0.303 | 0.091 | 0.010 | 0.060 | 0.223 |  | 0.236 | 0.064 | 0.038 | 0.059 | 0.167 |  | 0.172 | 0.112 | 0.116 | 0.103 | 0.129 |  | 0.241 | 0.034 | 0.033 | 0.063 | 0.178 |
| C(10) | 0.175 | 0.301 | 0.271 | 0.107 | 0.038 |  | 0.297 | 0.342 | 0.343 | 0.124 | -0.203 |  | 0.372 | 0.354 | 0.259 | 0.108 | -0.086 |  | 0.292 | 0.225 | 0.155 | 0.106 | -0.032 |  | 0.362 | 0.368 | 0.252 | 0.166 | -0.085 |

a C-atom charges have been summed with charges on directly bonded H-atoms.

b,c,d Single-point calculations on the species specified.

**Table 3 Atomic coordinates (Å) and net Mulliken charges for AM1 optimised structure 14.a**

| Atom | x | y | z | Charge | Chargeb |
| --- | --- | --- | --- | --- | --- |
| O | -0.557 | -1.054 | 1.052 | -0.235 | -0.235 |
| C | -1.353 | -2.116 | 0.488 | -0.036 | 0.214 |
| C | -1.334 | -1.988 | -1.026 | -0.192 | 0.063 |
| C | -0.601 | -0.693 | -1.344 | -0.152 | 0.094 |
| C | -0.100 | -0.158 | 0.038 | 0.027 | 0.027 |
| C | 1.398 | -0.158 | 0.038 | 0.079 | 0.274 |
| C | 2.116 | 1.007 | 0.038 | -0.238 | -0.041 |
| C | 1.465 | 2.253 | 0.151 | 0.180 | 0.372 |
| C | 0.062 | 2.329 | 0.274 | -0.237 | -0.040 |
| C | -0.700 | 1.193 | 0.278 | 0.077 | 0.271 |
| H | 1.886 | -1.150 | 0.022 | 0.194 |  |
| H | 3.222 | 0.984 | -0.015 | 0.197 |  |
| H | 2.067 | 3.184 | 0.173 | 0.193 |  |
| H | -0.411 | 3.322 | 0.404 | 0.197 |  |
| H | -1.794 | 1.218 | 0.444 | 0.194 |  |
| H | -2.382 | -2.000 | 0.918 | 0.120 |  |
| H | -0.890 | -3.069 | 0.853 | 0.129 |  |
| H | -2.375 | -1.965 | -1.438 | 0.130 |  |
| H | -0.809 | -2.861 | -1.492 | 0.126 |  |
| H | -1.283 | 0.051 | -1.828 | 0.123 |  |
| H | 0.259 | -0.870 | -2.036 | 0.123 |  |

a The structure may be viewed as file AM1_14.xyz.

b Sum of charges on C-atom and bonded H-atoms.

**Table 4** Atomic coordinates (Å) and net Mulliken charges for AM1 optimised structure **15**.a

| Atom | x | y | z | Charge | Chargeb |
| --- | --- | --- | --- | --- | --- |
| O | -0.485 | 0.042 | 1.007 | -0.138 | -0.138 |
| C | -1.646 | -0.762 | 1.345 | -0.057 | 0.248 |
| C | -1.785 | -1.879 | 0.320 | -0.200 | 0.076 |
| C | -0.649 | -1.726 | -0.689 | -0.173 | 0.119 |
| C | 0.092 | -0.464 | -0.335 | 0.083 | 0.083 |
| C | 1.561 | -0.464 | -0.335 | -0.137 | 0.049 |
| C | 2.241 | 0.704 | -0.335 | -0.088 | 0.098 |
| C | 1.553 | 1.978 | -0.369 | 0.009 | 0.194 |
| C | 0.198 | 2.050 | -0.446 | -0.220 | -0.030 |
| C | -0.596 | 0.850 | -0.473 | 0.112 | 0.301 |
| H | 2.064 | -1.444 | -0.360 | 0.186 |  |
| H | 3.346 | 0.720 | -0.339 | 0.186 |  |
| H | 2.172 | 2.895 | -0.365 | 0.185 |  |
| H | -0.330 | 3.017 | -0.517 | 0.190 |  |
| H | -1.670 | 0.901 | -0.735 | 0.189 |  |
| H | -2.531 | -0.076 | 1.375 | 0.137 |  |
| H | -1.400 | -1.136 | 2.378 | 0.169 |  |
| H | -2.781 | -1.820 | -0.190 | 0.131 |  |
| H | -1.728 | -2.879 | 0.824 | 0.145 |  |
| H | -1.047 | -1.656 | -1.735 | 0.146 |  |
| H | 0.042 | -2.609 | -0.648 | 0.146 |  |

a The structure may be viewed as file AM1_15.xyz.

b Sum of charges on C-atom and bonded H-atoms.

**Table 5** Atomic coordinates (Å) and net Mulliken charges for AM1-optimised structure **16**.a

| Atom | x | y | z | Charge | Chargeb |
| --- | --- | --- | --- | --- | --- |
| O | -1.509 | 0.725 | 0.409 | -0.220 | -0.220 |
| C | -2.374 | -0.410 | 0.294 | -0.041 | 0.214 |
| C | -1.669 | -1.688 | 0.699 | -0.196 | 0.064 |
| C | -0.401 | -1.905 | -0.108 | -0.181 | 0.113 |
| C | 0.402 | -0.670 | -0.210 | 0.119 | 0.119 |
| C | 1.784 | -0.670 | -0.210 | -0.235 | -0.042 |
| C | 2.502 | 0.533 | -0.210 | 0.149 | 0.340 |
| C | 1.840 | 1.784 | -0.191 | -0.220 | -0.023 |
| C | 0.476 | 1.847 | -0.199 | 0.057 | 0.260 |
| C | -0.337 | 0.617 | -0.386 | -0.013 | 0.175 |
| H | 2.337 | -1.628 | -0.164 | 0.193 |  |
| H | 3.611 | 0.508 | -0.187 | 0.191 |  |
| H | 2.447 | 2.707 | -0.131 | 0.197 |  |
| H | -0.082 | 2.798 | -0.109 | 0.203 |  |
| H | -0.644 | 0.628 | -1.496 | 0.188 |  |
| H | -2.771 | -0.472 | -0.753 | 0.097 |  |
| H | -3.208 | -0.156 | 1.007 | 0.159 |  |
| H | -2.361 | -2.558 | 0.545 | 0.137 |  |
| H | -1.414 | -1.648 | 1.792 | 0.123 |  |
| H | -0.667 | -2.239 | -1.155 | 0.150 |  |
| H | 0.204 | -2.737 | 0.349 | 0.145 |  |

a The structure may be viewed as file AM1_16.xyz.

b Sum of charges on C-atom and bonded H-atoms.

**Table 6** Atomic coordinates (Å) and net Mulliken charges for AM1 optimised structure **17**.a

| Atom | x | y | z | Charge | Chargeb |
| --- | --- | --- | --- | --- | --- |
| O | -0.520 | -1.549 | 0.678 | -0.172 | -0.172 |
| C | -1.704 | -1.755 | -0.099 | -0.020 | 0.258 |
| C | -1.420 | -1.355 | -1.551 | -0.256 | 0.063 |
| C | -0.591 | -0.143 | -1.620 | 0.053 | 0.365 |
| C | 0.074 | -0.327 | 0.433 | 0.011 | 0.011 |
| C | 1.507 | -0.327 | 0.433 | -0.074 | 0.119 |
| C | 2.180 | 0.874 | 0.433 | -0.121 | 0.064 |
| C | 1.471 | 2.097 | 0.467 | -0.017 | 0.166 |
| C | 0.084 | 2.108 | 0.499 | -0.165 | 0.018 |
| C | -0.635 | 0.906 | 0.518 | -0.073 | 0.107 |
| H | 2.034 | -1.297 | 0.453 | 0.193 |  |
| H | 3.285 | 0.891 | 0.430 | 0.185 |  |
| H | 2.035 | 3.047 | 0.490 | 0.182 |  |
| H | -0.465 | 3.066 | 0.547 | 0.183 |  |
| H | -1.730 | 0.908 | 0.658 | 0.181 |  |
| H | -2.552 | -1.156 | 0.325 | 0.110 |  |
| H | -1.913 | -2.854 | 0.007 | 0.168 |  |
| H | -2.407 | -1.186 | -2.069 | 0.164 |  |
| H | -0.898 | -2.211 | -2.064 | 0.155 |  |
| H | -1.087 | 0.832 | -1.771 | 0.154 |  |
| H | 0.448 | -0.218 | -1.987 | 0.158 |  |

a The structure may be viewed as file AM1_17.xyz.

b Sum of charges on C-atom and bonded H-atoms.

**Table 7** Atomic coordinates (Å) and net Mulliken charges for AM1 optimised structure **18**.a

| Atom | x | y | z | Charge | Chargeb |
| --- | --- | --- | --- | --- | --- |
| O | -0.263 | -1.758 | 0.169 | -0.117 | -0.117 |
| C | -1.716 | -1.707 | 0.092 | -0.039 | 0.255 |
| C | -2.167 | -0.689 | -0.931 | -0.213 | 0.063 |
| C | -1.582 | 0.689 | -0.697 | -0.148 | 0.109 |
| C | 0.361 | -0.584 | 0.226 | 0.267 | 0.267 |
| C | 1.776 | -0.584 | 0.226 | -0.248 | -0.045 |
| C | 2.449 | 0.615 | 0.226 | 0.098 | 0.287 |
| C | 1.746 | 1.863 | 0.221 | -0.187 | 0.003 |
| C | 0.393 | 1.902 | 0.240 | -0.042 | 0.140 |
| C | -0.433 | 0.673 | 0.318 | -0.159 | 0.038 |
| H | 2.310 | -1.552 | 0.207 | 0.203 |  |
| H | 3.557 | 0.630 | 0.217 | 0.189 |  |
| H | 2.342 | 2.793 | 0.191 | 0.189 |  |
| H | -0.164 | 2.856 | 0.220 | 0.183 |  |
| H | -0.900 | 0.661 | 1.363 | 0.197 |  |
| H | -2.099 | -1.481 | 1.122 | 0.124 |  |
| H | -1.975 | -2.761 | -0.206 | 0.170 |  |
| H | -3.290 | -0.638 | -0.903 | 0.146 |  |
| H | -1.882 | -1.048 | -1.958 | 0.129 |  |
| H | -2.371 | 1.391 | -0.315 | 0.129 |  |
| H | -1.211 | 1.109 | -1.670 | 0.128 |  |

a The structure may be viewed as file AM1_18.xyz.

b Sum of charges on C-atom and bonded H-atoms.

**Table 8** Atomic coordinates (Å) and net Mulliken charges for AM1 optimised structure **18**.a

| Atom | x | y | z | Charge | Chargeb |
| --- | --- | --- | --- | --- | --- |
| O | -0.206 | -1.747 | -0.076 | -0.130 | -0.130 |
| C | -1.629 | -1.821 | -0.389 | -0.031 | 0.267 |
| C | -2.436 | -0.595 | -0.044 | -0.213 | 0.056 |
| C | -1.697 | 0.681 | -0.382 | -0.154 | 0.106 |
| C | 0.389 | -0.578 | 0.106 | 0.281 | 0.281 |
| C | 1.811 | -0.578 | 0.106 | -0.253 | -0.051 |
| C | 2.485 | 0.618 | 0.106 | 0.093 | 0.282 |
| C | 1.786 | 1.870 | 0.102 | -0.187 | 0.002 |
| C | 0.435 | 1.909 | 0.183 | -0.044 | 0.140 |
| C | -0.369 | 0.678 | 0.365 | -0.159 | 0.046 |
| H | 2.342 | -1.545 | 0.056 | 0.202 |  |
| H | 3.592 | 0.631 | 0.078 | 0.189 |  |
| H | 2.381 | 2.797 | 0.018 | 0.189 |  |
| H | -0.128 | 2.859 | 0.167 | 0.183 |  |
| H | -0.609 | 0.641 | 1.488 | 0.204 |  |
| H | -1.958 | -2.725 | 0.196 | 0.158 |  |
| H | -1.649 | -2.042 | -1.492 | 0.141 |  |
| H | -2.705 | -0.603 | 1.047 | 0.119 |  |
| H | -3.402 | -0.637 | -0.620 | 0.150 |  |
| H | -2.302 | 1.573 | -0.071 | 0.137 |  |
| H | -1.519 | 0.760 | -1.486 | 0.123 |  |

a The structure may be viewed as file AM1_18.xyz.

b Sum of charges on C-atom and bonded H-atoms.

**Table 9** Atomic coordinates (Å) and Mulliken charges for HF/3-21G optimised structure **14**.a

| Atom | x | y | z | Charge | Chargeb |
| --- | --- | --- | --- | --- | --- |
| O | -0.590 | -0.934 | 1.063 | -0.619 | -0.619 |
| C | -1.383 | -1.958 | 0.361 | -0.096 | 0.428 |
| C | -0.904 | -1.884 | -1.091 | -0.491 | 0.051 |
| C | -0.640 | -0.380 | -1.298 | -0.428 | 0.137 |
| C | -0.058 | 0.033 | 0.167 | 0.026 | 0.026 |
| C | 1.412 | -0.062 | 0.044 | 0.000 | 0.341 |
| C | 2.182 | 1.035 | -0.125 | -0.313 | 0.012 |
| C | 1.581 | 2.305 | -0.034 | -0.075 | 0.272 |
| C | 0.216 | 2.486 | 0.251 | -0.316 | 0.010 |
| C | -0.564 | 1.395 | 0.427 | 0.000 | 0.343 |
| H | 1.832 | -1.049 | 0.046 | 0.341 |  |
| H | 3.238 | 0.960 | -0.276 | 0.325 |  |
| H | 2.200 | 3.174 | -0.151 | 0.347 |  |
| H | -0.171 | 3.475 | 0.376 | 0.326 |  |
| H | -1.594 | 1.476 | 0.713 | 0.343 |  |
| H | -2.429 | -1.707 | 0.452 | 0.247 |  |
| H | -1.182 | -2.898 | 0.844 | 0.276 |  |
| H | -1.652 | -2.241 | -1.785 | 0.283 |  |
| H | 0.005 | -2.454 | -1.228 | 0.259 |  |
| H | -1.570 | 0.145 | -1.464 | 0.284 |  |
| H | 0.053 | -0.150 | -2.090 | 0.280 |  |

a The structure may be viewed as file 321G_14.xyz.

b Sum of charges on C-atom and bonded H-atoms.

**Table 10** Atomic coordinates (Å) and Mulliken charges for HF/3-21G optimised structure **16**.a

| Atom | x | y | z | Charge | Chargeb |
| --- | --- | --- | --- | --- | --- |
| O | -1.911 | 1.392 | 0.578 | -0.614 | -0.614 |
| C | -2.808 | 0.241 | 0.508 | -0.109 | 0.408 |
| C | -2.060 | -1.013 | 0.956 | -0.466 | 0.078 |
| C | -0.824 | -1.248 | 0.048 | -0.484 | 0.093 |
| C | 0.021 | -0.010 | -0.006 | 0.126 | 0.126 |
| C | 1.382 | -0.009 | 0.023 | -0.300 | 0.018 |
| C | 2.073 | 1.205 | 0.023 | -0.076 | 0.271 |
| C | 1.433 | 2.469 | 0.028 | -0.306 | 0.021 |
| C | 0.090 | 2.514 | 0.002 | -0.049 | 0.303 |
| C | -0.719 | 1.281 | -0.181 | -0.025 | 0.297 |
| H | 1.928 | -0.927 | 0.087 | 0.318 |  |
| H | 3.145 | 1.180 | 0.058 | 0.347 |  |
| H | 2.024 | 3.357 | 0.099 | 0.327 |  |
| H | -0.462 | 3.430 | 0.063 | 0.352 |  |
| H | -0.938 | 1.277 | -1.266 | 0.322 |  |
| H | -3.180 | 0.135 | -0.504 | 0.228 |  |
| H | -3.620 | 0.487 | 1.170 | 0.288 |  |
| H | -2.714 | -1.872 | 0.896 | 0.274 |  |
| H | -1.743 | -0.895 | 1.984 | 0.269 |  |
| H | -1.164 | -1.467 | -0.963 | 0.290 |  |
| H | -0.236 | -2.089 | 0.389 | 0.287 |  |

a The structure may be viewed as file 321G_16.xyz.

b Sum of charges on C-atom and bonded H-atoms.

**Table 11** Atomic coordinates (Å) and Mulliken charges for HF/3-21G optimised structure **18**.a

| Atom | x | y | z | Charge | Chargeb |
| --- | --- | --- | --- | --- | --- |
| O | -0.626 | -1.120 | -0.042 | -0.674 | -0.674 |
| C | -2.111 | -1.120 | -0.088 | -0.135 | 0.446 |
| C | -2.552 | -0.135 | -1.174 | -0.497 | 0.071 |
| C | -1.876 | 1.260 | -1.008 | -0.379 | 0.183 |
| C | 0.013 | 0.004 | 0.013 | 0.698 | 0.698 |
| C | 1.408 | 0.017 | -0.065 | -0.325 | 0.008 |
| C | 2.049 | 1.213 | -0.051 | -0.121 | 0.214 |
| C | 1.358 | 2.477 | 0.042 | -0.278 | 0.035 |
| C | 0.030 | 2.500 | 0.134 | -0.089 | 0.223 |
| C | -0.782 | 1.250 | 0.136 | -0.550 | -0.203 |
| H | 1.927 | -0.914 | -0.146 | 0.333 |  |
| H | 3.119 | 1.228 | -0.119 | 0.335 |  |
| H | 1.934 | 3.379 | 0.040 | 0.314 |  |
| H | -0.509 | 3.423 | 0.216 | 0.313 |  |
| H | -1.318 | 1.193 | 1.086 | 0.346 |  |
| H | -2.465 | -0.844 | 0.894 | 0.267 |  |
| H | -2.368 | -2.139 | -0.308 | 0.314 |  |
| H | -3.628 | -0.038 | -1.129 | 0.285 |  |
| H | -2.294 | -0.550 | -2.138 | 0.283 |  |
| H | -2.605 | 2.014 | -0.751 | 0.281 |  |
| H | -1.395 | 1.552 | -1.930 | 0.281 |  |

a The structure may be viewed as file 321G_18.xyz.

b Sum of charges on C-atom and bonded H-atoms.

**Table 12** Atomic coordinates (Å) and Mulliken charges for HF/3-21G optimised structure **18**.a

| Atom | x | y | z | Charge | Chargeb |
| --- | --- | --- | --- | --- | --- |
| O | -0.596 | -1.111 | -0.171 | -0.688 | -0.688 |
| C | -2.054 | -1.277 | -0.481 | -0.113 | 0.479 |
| C | -2.856 | -0.021 | -0.141 | -0.504 | 0.049 |
| C | -2.080 | 1.248 | -0.540 | -0.402 | 0.146 |
| C | 0.022 | 0.006 | 0.002 | 0.696 | 0.696 |
| C | 1.424 | 0.011 | -0.016 | -0.323 | 0.008 |
| C | 2.078 | 1.199 | -0.010 | -0.123 | 0.210 |
| C | 1.399 | 2.474 | 0.023 | -0.280 | 0.033 |
| C | 0.073 | 2.510 | 0.118 | -0.095 | 0.217 |
| C | -0.743 | 1.263 | 0.247 | -0.510 | -0.151 |
| H | 1.934 | -0.924 | -0.098 | 0.331 |  |
| H | 3.149 | 1.199 | -0.061 | 0.333 |  |
| H | 1.982 | 3.369 | -0.030 | 0.313 |  |
| H | -0.461 | 3.438 | 0.165 | 0.312 |  |
| H | -1.007 | 1.204 | 1.312 | 0.359 |  |
| H | -2.343 | -2.141 | 0.088 | 0.302 |  |
| H | -2.069 | -1.499 | -1.535 | 0.289 |  |
| H | -3.081 | 0.009 | 0.917 | 0.263 |  |
| H | -3.795 | -0.074 | -0.677 | 0.290 |  |
| H | -2.654 | 2.128 | -0.284 | 0.281 |  |
| H | -1.882 | 1.269 | -1.605 | 0.267 |  |

a The structure may be viewed as file 321G_18.xyz.

b Sum of charges on C-atom and bonded H-atoms.

**Table 13**  Atomic coordinates (Å) and Mulliken charges for B3LYP/6-31G* optimised structure **14** as well as MP2/6-31G*// B3LYP/6-31G* charges.a

|  |  |  |  | B3LYP | | MP2b | |
| --- | --- | --- | --- | --- | --- | --- | --- |
| Atom | x | y | z | charge | chargec | charge | chargec |
| O | 1.176 | -0.244 | 1.167 | -0.489 | -0.489 | -0.641 | -0.641 |
| C | 2.468 | -0.331 | 0.518 | -0.045 | 0.336 | -0.011 | 0.415 |
| C | 2.311 | 0.483 | -0.758 | -0.307 | 0.095 | -0.367 | 0.079 |
| C | 0.904 | 0.114 | -1.239 | -0.335 | 0.094 | -0.386 | 0.091 |
| C | 0.140 | -0.080 | 0.232 | 0.253 | 0.253 | 0.218 | 0.218 |
| C | -0.610 | 1.180 | 0.423 | -0.067 | 0.161 | -0.040 | 0.258 |
| C | -1.958 | 1.258 | 0.182 | -0.103 | 0.117 | -0.251 | 0.035 |
| C | -2.669 | 0.076 | -0.125 | -0.071 | 0.163 | -0.047 | 0.259 |
| C | -2.047 | -1.188 | -0.198 | -0.104 | 0.116 | -0.254 | 0.033 |
| C | -0.698 | -1.281 | 0.040 | -0.072 | 0.155 | -0.046 | 0.252 |
| H | -0.034 | 2.053 | 0.717 | 0.227 |  | 0.298 |  |
| H | -2.489 | 2.199 | 0.274 | 0.220 |  | 0.286 |  |
| H | -3.744 | 0.139 | -0.282 | 0.234 |  | 0.306 |  |
| H | -2.643 | -2.074 | -0.387 | 0.220 |  | 0.287 |  |
| H | -0.189 | -2.241 | 0.051 | 0.228 |  | 0.298 |  |
| H | 2.706 | -1.382 | 0.308 | 0.174 |  | 0.192 |  |
| H | 3.202 | 0.064 | 1.222 | 0.207 |  | 0.233 |  |
| H | 3.054 | 0.227 | -1.521 | 0.211 |  | 0.236 |  |
| H | 2.383 | 1.555 | -0.549 | 0.191 |  | 0.211 |  |
| H | 0.893 | -0.841 | -1.767 | 0.212 |  | 0.235 |  |
| H | 0.412 | 0.865 | -1.858 | 0.217 |  | 0.242 |  |

a The structure may be viewed as file DFT_14.xyz.b Single point calculation.

c Sum of charges on C-atom and bonded H-atoms.

**Table 14**  Atomic coordinates (Å) and Mulliken charges for B3LYP/6-31G* optimised structure **15** as well as MP2/6-31G*// B3LYP/6-31G* charges.a

|  |  |  |  | B3LYP | | MP2b | |
| --- | --- | --- | --- | --- | --- | --- | --- |
| Atom | x | y | z | charge | chargec | charge | chargec |
| O | 0.577 | -0.451 | 0.960 | -0.425 | -0.425 | -0.627 | -0.627 |
| C | 2.043 | -0.608 | 0.905 | -0.059 | 0.371 | -0.020 | 0.448 |
| C | 2.511 | -0.022 | -0.428 | -0.344 | 0.064 | -0.409 | 0.045 |
| C | 1.419 | 1.007 | -0.784 | -0.320 | 0.094 | -0.347 | 0.122 |
| C | 0.142 | 0.434 | -0.188 | 0.189 | 0.189 | 0.161 | 0.161 |
| C | -0.937 | 1.381 | 0.214 | -0.073 | 0.134 | -0.102 | 0.177 |
| C | -2.215 | 0.961 | 0.320 | -0.122 | 0.090 | -0.220 | 0.060 |
| C | -2.573 | -0.409 | 0.010 | -0.079 | 0.144 | -0.083 | 0.212 |
| C | -1.657 | -1.322 | -0.448 | -0.101 | 0.112 | -0.246 | 0.034 |
| C | -0.316 | -0.911 | -0.622 | -0.003 | 0.225 | 0.066 | 0.368 |
| H | -0.663 | 2.417 | 0.391 | 0.207 |  | 0.279 |  |
| H | -3.001 | 1.649 | 0.612 | 0.212 |  | 0.280 |  |
| H | -3.612 | -0.707 | 0.125 | 0.223 |  | 0.294 |  |
| H | -1.946 | -2.336 | -0.700 | 0.213 |  | 0.280 |  |
| H | 0.407 | -1.571 | -1.087 | 0.228 |  | 0.303 |  |
| H | 2.260 | -1.668 | 1.044 | 0.213 |  | 0.232 |  |
| H | 2.401 | -0.041 | 1.770 | 0.218 |  | 0.236 |  |
| H | 2.597 | -0.798 | -1.194 | 0.191 |  | 0.208 |  |
| H | 3.494 | 0.448 | -0.337 | 0.217 |  | 0.247 |  |
| H | 1.325 | 1.169 | -1.862 | 0.215 |  | 0.240 |  |
| H | 1.620 | 1.977 | -0.318 | 0.200 |  | 0.229 |  |

a The structure may be viewed as file DFT_15.xyz.b Single point calculation.

c Sum of charges on C-atom and bonded H-atoms.

**Table 15**  Atomic coordinates (Å) and Mulliken charges for B3LYP/6-31G* optimised structure **16** as well as MP2/6-31G*// B3LYP/6-31G* charges.a

|  |  |  |  | B3LYP | | MP2b | |
| --- | --- | --- | --- | --- | --- | --- | --- |
| Atom | x | y | z | charge | chargec | charge | chargec |
| O | -0.996 | 1.415 | 0.196 | -0.453 | -0.453 | -0.617 | -0.617 |
| C | -2.274 | 0.832 | -0.140 | -0.065 | 0.309 | -0.037 | 0.390 |
| C | -2.375 | -0.591 | 0.398 | -0.299 | 0.091 | -0.362 | 0.084 |
| C | -1.247 | -1.469 | -0.182 | -0.374 | 0.059 | -0.399 | 0.089 |
| C | 0.082 | -0.789 | -0.108 | 0.187 | 0.187 | 0.138 | 0.138 |
| C | 1.293 | -1.452 | -0.004 | -0.148 | 0.064 | -0.259 | 0.021 |
| C | 2.491 | -0.730 | 0.101 | -0.075 | 0.158 | -0.058 | 0.246 |
| C | 2.544 | 0.685 | 0.108 | -0.101 | 0.122 | -0.242 | 0.047 |
| C | 1.378 | 1.394 | 0.009 | -0.070 | 0.172 | -0.070 | 0.241 |
| C | 0.101 | 0.698 | -0.260 | 0.043 | 0.292 | 0.100 | 0.362 |
| H | 1.315 | -2.537 | 0.047 | 0.212 |  | 0.280 |  |
| H | 3.422 | -1.284 | 0.204 | 0.233 |  | 0.305 |  |
| H | 3.496 | 1.190 | 0.233 | 0.223 |  | 0.289 |  |
| H | 1.343 | 2.479 | 0.042 | 0.242 |  | 0.311 |  |
| H | 0.151 | 0.724 | -1.399 | 0.249 |  | 0.262 |  |
| H | -2.410 | 0.863 | -1.231 | 0.164 |  | 0.185 |  |
| H | -3.008 | 1.495 | 0.320 | 0.210 |  | 0.242 |  |
| H | -3.347 | -1.021 | 0.137 | 0.197 |  | 0.228 |  |
| H | -2.308 | -0.569 | 1.491 | 0.193 |  | 0.217 |  |
| H | -1.454 | -1.677 | -1.245 | 0.220 |  | 0.243 |  |
| H | -1.190 | -2.449 | 0.304 | 0.213 |  | 0.245 |  |

a The structure may be viewed as file DFT_16.xyz.b Single point calculation.

c Sum of charges on C-atom and bonded H-atoms.

**Table 16**  Atomic coordinates (Å) and Mulliken charges for B3LYP/6-31G* optimised structure **17** as well as MP2/6-31G*// B3LYP/6-31G* charges.a

|  |  |  |  | B3LYP | | MP2b | |
| --- | --- | --- | --- | --- | --- | --- | --- |
| Atom | x | y | z | charge | chargec | charge | chargec |
| O | -1.274 | -0.532 | 1.100 | -0.472 | -0.472 | -0.618 | -0.618 |
| C | -2.356 | -0.615 | 0.150 | -0.067 | 0.335 | -0.033 | 0.416 |
| C | -2.240 | 0.676 | -0.670 | -0.306 | 0.135 | -0.374 | 0.117 |
| C | -0.803 | 0.885 | -1.054 | -0.300 | 0.187 | -0.317 | 0.245 |
| C | -0.096 | -0.268 | 0.477 | 0.292 | 0.292 | 0.266 | 0.266 |
| C | 0.643 | -1.335 | -0.148 | -0.105 | 0.104 | -0.155 | 0.128 |
| C | 1.956 | -1.139 | -0.500 | -0.124 | 0.087 | -0.210 | 0.068 |
| C | 2.596 | 0.099 | -0.223 | -0.092 | 0.123 | -0.134 | 0.149 |
| C | 1.922 | 1.135 | 0.405 | -0.109 | 0.103 | -0.215 | 0.063 |
| C | 0.582 | 0.955 | 0.784 | -0.121 | 0.106 | -0.136 | 0.166 |
| H | 0.151 | -2.291 | -0.295 | 0.209 |  | 0.282 |  |
| H | 2.523 | -1.942 | -0.959 | 0.211 |  | 0.278 |  |
| H | 3.641 | 0.223 | -0.490 | 0.215 |  | 0.284 |  |
| H | 2.427 | 2.065 | 0.641 | 0.212 |  | 0.278 |  |
| H | 0.044 | 1.704 | 1.358 | 0.227 |  | 0.303 |  |
| H | -3.279 | -0.686 | 0.725 | 0.222 |  | 0.251 |  |
| H | -2.249 | -1.508 | -0.478 | 0.180 |  | 0.198 |  |
| H | -2.612 | 1.526 | -0.091 | 0.212 |  | 0.239 |  |
| H | -2.833 | 0.601 | -1.594 | 0.229 |  | 0.252 |  |
| H | -0.452 | 1.912 | -1.071 | 0.246 |  | 0.283 |  |
| H | -0.388 | 0.294 | -1.865 | 0.241 |  | 0.279 |  |

a The structure may be viewed as file DFT_17.xyz.b Single point calculation.

c Sum of charges on C-atom and bonded H-atoms.

**Table 17**  Atomic coordinates (Å) and Mulliken charges for B3LYP/6-31G* optimised structure **18** as well as MP2/6-31G*// B3LYP/6-31G* charges.a

|  |  |  |  | B3LYP | | MP2b | |
| --- | --- | --- | --- | --- | --- | --- | --- |
| Atom | x | y | z | charge | chargec | charge | chargec |
| O | 1.062 | -1.408 | -0.134 | -0.419 | -0.419 | -0.590 | -0.590 |
| C | 2.285 | -0.645 | -0.393 | -0.086 | 0.342 | -0.053 | 0.424 |
| C | 2.325 | 0.573 | 0.523 | -0.323 | 0.091 | -0.383 | 0.080 |
| C | 1.065 | 1.455 | 0.370 | -0.280 | 0.127 | -0.325 | 0.137 |
| C | -0.065 | -0.753 | -0.107 | 0.460 | 0.460 | 0.595 | 0.595 |
| C | -1.240 | -1.446 | 0.226 | -0.153 | 0.065 | -0.293 | -0.002 |
| C | -2.426 | -0.743 | 0.272 | -0.097 | 0.128 | -0.087 | 0.210 |
| C | -2.516 | 0.662 | -0.005 | -0.101 | 0.107 | -0.226 | 0.051 |
| C | -1.401 | 1.357 | -0.337 | -0.083 | 0.129 | -0.100 | 0.178 |
| C | -0.068 | 0.702 | -0.432 | -0.281 | -0.032 | -0.369 | -0.085 |
| H | -1.188 | -2.506 | 0.450 | 0.218 |  | 0.291 |  |
| H | -3.336 | -1.277 | 0.536 | 0.225 |  | 0.297 |  |
| H | -3.483 | 1.150 | 0.056 | 0.208 |  | 0.277 |  |
| H | -1.444 | 2.420 | -0.556 | 0.211 |  | 0.278 |  |
| H | 0.235 | 0.762 | -1.495 | 0.249 |  | 0.284 |  |
| H | 2.286 | -0.380 | -1.456 | 0.199 |  | 0.216 |  |
| H | 3.088 | -1.354 | -0.201 | 0.229 |  | 0.261 |  |
| H | 3.231 | 1.145 | 0.294 | 0.211 |  | 0.236 |  |
| H | 2.420 | 0.223 | 1.555 | 0.203 |  | 0.227 |  |
| H | 1.280 | 2.383 | -0.167 | 0.201 |  | 0.231 |  |
| H | 0.670 | 1.729 | 1.351 | 0.206 |  | 0.232 |  |

a The structure may be viewed as file DFT_18.xyz.b Single point calculation.

c Sum of charges on C-atom and bonded H-atoms.

**Table 18**  Atomic coordinates (Å) and Mulliken charges for B3LYP/6-31G* optimised structure **18** as well as MP2/6-31G*// B3LYP/6-31G* charges.a

|  |  |  |  | B3LYP | | MP2b | |
| --- | --- | --- | --- | --- | --- | --- | --- |
| Atom | x | y | z | charge | chargec | charge | chargec |
| O | 1.011 | -1.419 | -0.051 | -0.430 | -0.430 | -0.606 | -0.606 |
| C | 2.336 | -0.804 | 0.188 | -0.071 | 0.367 | -0.024 | 0.459 |
| C | 2.402 | 0.670 | -0.178 | -0.323 | 0.076 | -0.392 | 0.062 |
| C | 1.162 | 1.421 | 0.319 | -0.291 | 0.104 | -0.337 | 0.115 |
| C | -0.092 | -0.734 | -0.104 | 0.456 | 0.456 | 0.595 | 0.595 |
| C | -1.305 | -1.446 | -0.030 | -0.155 | 0.062 | -0.292 | -0.003 |
| C | -2.485 | -0.742 | 0.077 | -0.093 | 0.131 | -0.088 | 0.207 |
| C | -2.545 | 0.693 | 0.096 | -0.102 | 0.107 | -0.224 | 0.053 |
| C | -1.406 | 1.412 | -0.048 | -0.086 | 0.125 | -0.104 | 0.173 |
| C | -0.089 | 0.752 | -0.294 | -0.259 | 0.002 | -0.346 | -0.054 |
| H | -1.277 | -2.529 | 0.019 | 0.217 |  | 0.289 |  |
| H | -3.412 | -1.299 | 0.181 | 0.224 |  | 0.295 |  |
| H | -3.505 | 1.181 | 0.226 | 0.209 |  | 0.277 |  |
| H | -1.420 | 2.498 | -0.064 | 0.211 |  | 0.277 |  |
| H | 0.026 | 0.840 | -1.399 | 0.261 |  | 0.292 |  |
| H | 2.519 | -0.979 | 1.252 | 0.214 |  | 0.232 |  |
| H | 3.017 | -1.423 | -0.396 | 0.224 |  | 0.251 |  |
| H | 2.501 | 0.787 | -1.264 | 0.188 |  | 0.212 |  |
| H | 3.312 | 1.084 | 0.269 | 0.211 |  | 0.242 |  |
| H | 1.197 | 2.472 | 0.018 | 0.200 |  | 0.233 |  |
| H | 1.094 | 1.395 | 1.412 | 0.195 |  | 0.219 |  |

a The structure may be viewed as file DFT_18.xyz.b Single point calculation.

c Sum of charges on C-atom and bonded H-atoms.
